# Supplementary material
Source: PubMed Central journal article supplement (PMC3031090)
Supplement: NIHMS194405-supplement-1.pdf [file NIHMS194405-supplement-1.pdf]

# European Journal of Immunology

Supporting Information

for

DOI 10.1002/eji.200940234

**Loss of DNAM-1 contributes to CD8<sup>+</sup> T-cell exhaustion in chronic HIV-1 infection**

Marina Cella, Rachel Presti, William Vermi, Kerry Lavender, Emma Turnbull, Christina Ochsenbauer-Jambor, John C. Kappes, Guido Ferrari, Lisa Kessels, Ian Williams, CHAVI Clinical Core B, Andrew J. McMichael, Barton F. Haynes, Persephone Borrow and Marco Colonna and the NIAID Center for HIV/AIDS Vaccine Immunology

## Supporting Information

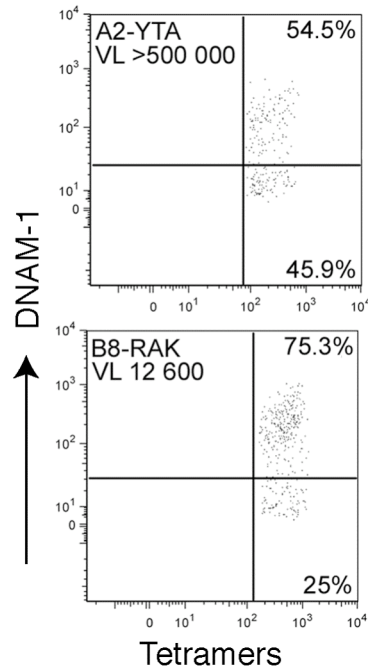

**Supplementary Figure 1.** DNAM-1 downregulation on virus-specific CD8 T cells during chronic infection. Staining of antigen-specific T cells from HIV-1<sup>+</sup> subjects. PBMCs were stained with antibodies to CD8 and DNAM-1 together with tetramers/pentamers to identify cells responding to the HLA-A2-restricted HIV-1 epitope YTAFTIPSI (A2-YTA) or the HLA-B8-restricted epitope RAKFKQLL (B8-RAK). The plasma viral loads are indicated. The dotplots shown are gated on CD8<sup>+</sup> and tetramer<sup>+</sup> cells. These results are representative of observations made in 8 HIV-1<sup>+</sup> donors.

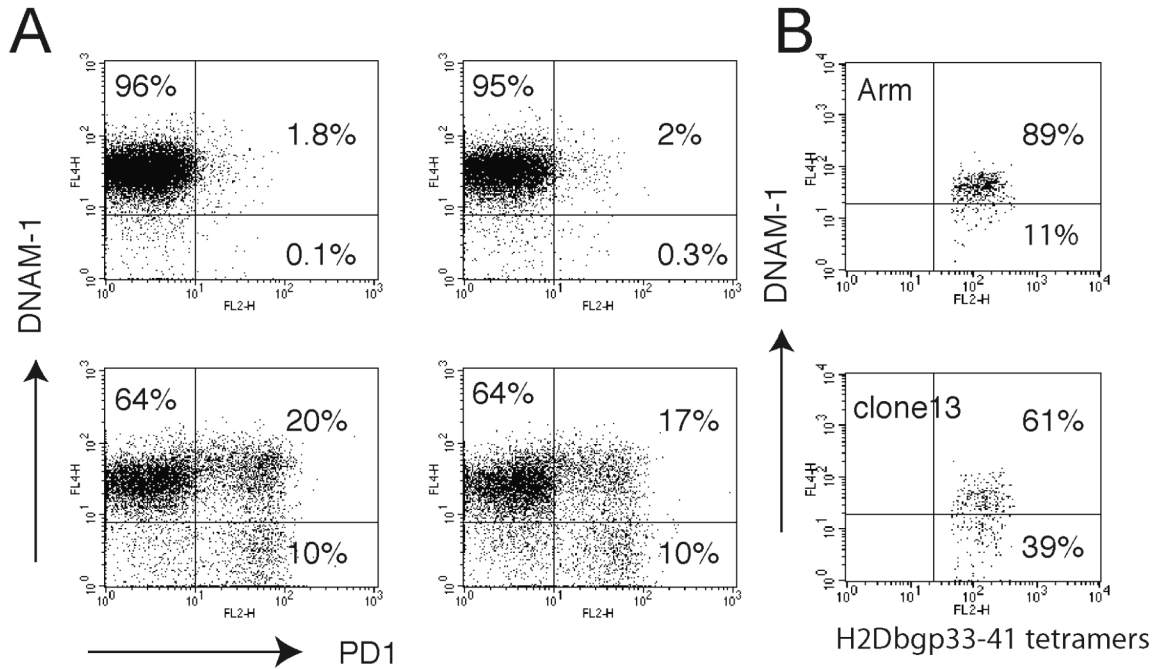

**Supplementary Figure 2.** A subset of PD1<sup>+</sup> CD8 T cells during chronic infection in mice downregulates DNAM-1. (A) Splenocytes of mice infected with the acute strain of LCMV (Arm) or the chronic strain of LCMV (clone 13) were stained for CD3, CD8, PD1 and DNAM-1 at 30 days post-infection. Results from two individual mice are shown. The data are representative of findings from two independent experiments. (B) Purified CD8 T cells were stained with H2D<sup>b</sup> gp33-41 tetramers, anti-CD8 and anti-DNAM-1. The dotplots shown are gated on CD8<sup>+</sup> and tetramer<sup>+</sup> cells. One representative experiment of two is shown.
